# Supplementary material for: Analysis of perfluoroalkyl and polyfluoroalkyl substances in serum and plasma by solvent precipitation-isotope dilution-direct injection-LC/MS/MS
Source: Royal Society of Chemistry journal article supplement (doi:10.1039/c6ay02809h), 2016-12-24
Supplement: c6ay02809h1.pdf [file c6ay02809h1.pdf]

**Supplementary Table 1: Calibration levels and Spiking Concentrations**

| Concentration in 50:50 Acetonitrile:MilliQ™ Water with phosphoric acid (nominal ng mL <sup>-1</sup> ) |         |         |        |        |        |       |       |       |      |      |      |      |      |
|-------------------------------------------------------------------------------------------------------|---------|---------|--------|--------|--------|-------|-------|-------|------|------|------|------|------|
| Standard                                                                                              | 1       | 2       | 3      | 4      | 5      | 6     | 7     | 8     | 9    | 10   | 11   | 12   | 13   |
| All PFCAs, PFSA's (except PFOS), EtFOSAA, MeFOSAA, FOSA, FBSA and SRSs                                | 0.00250 | 0.00500 | 0.0100 | 0.0250 | 0.0500 | 0.100 | 0.250 | 0.500 | 1.00 | 2.50 | 5.00 | 10.0 | 25.0 |
| PFOS                                                                                                  | 0.0100  | 0.0200  | 0.0400 | 0.100  | 0.200  | 0.400 | 1.00  | 2.00  | 4.00 | 10.0 | 20.0 | 40.0 | 100  |

a) IS concentration in all standards was 9.25 ng/mL<sup>-1</sup> for the method validation and 1.00 ng/mL<sup>-1</sup> for the ARC study

| Concentration in human plasma; 9.63 dilution factor applied (nominal ng mL <sup>-1</sup> ) |        |        |        |       |       |       |      |      |      |      |      |      |     |
|--------------------------------------------------------------------------------------------|--------|--------|--------|-------|-------|-------|------|------|------|------|------|------|-----|
| All PFCAs, PFSA's (except PFOS), EtFOSAA, MeFOSAA, FOSA, FBSA and SRSs                     | 0.0241 | 0.0482 | 0.0963 | 0.241 | 0.482 | 0.963 | 2.41 | 4.82 | 9.63 | 24.1 | 48.2 | 96.3 | 241 |
| PFOS                                                                                       | 0.0963 | 0.193  | 0.385  | 0.963 | 1.93  | 3.85  | 9.63 | 19.3 | 38.5 | 96.3 | 193  | 385  | 963 |

**Method Validation LCS Spiking Levels**

| Bovine LCS (prepared in triplicate)                                    | Concentration in Serum (ng mL <sup>-1</sup> ) |         |         |         |
|------------------------------------------------------------------------|-----------------------------------------------|---------|---------|---------|
|                                                                        | Level 1                                       | Level 2 | Level 3 | Level 4 |
| All PFCAs, PFSA's (except PFOS), EtFOSAA, MeFOSAA, FOSA, FBSA and SRSs | 0.500                                         | 5.00    | 25.0    | 35.0    |
| PFOS                                                                   | 2.00                                          | 20.0    | 100     | 140     |

  

| Human LCS (prepared in triplicate)                                     | Concentration in Plasma (ng mL <sup>-1</sup> ) |         |         |
|------------------------------------------------------------------------|------------------------------------------------|---------|---------|
|                                                                        | Level 1                                        | Level 2 | Level 3 |
| All PFCAs, PFSA's (except PFOS), EtFOSAA, MeFOSAA, FOSA, FBSA and SRSs | 5.00                                           | 25.0    | 35.0    |
| PFOS                                                                   | 20.0                                           | 100     | 140     |

  

| Human B+L LCSs      | Concentration in Plasma (ng mL <sup>-1</sup> ) |         |
|---------------------|------------------------------------------------|---------|
|                     | Level 1                                        | Level 2 |
| PFOA, PFHS and SRSs | 5.00                                           | 25.0    |
| PFOS                | 20.0                                           | 100     |

**Supplementary Table 1 (continued)****American Red Cross LCS Spiking Levels**

| <b>Bovine LCS (prepared in triplicate)</b>                             | Concentration in Serum (ng mL <sup>-1</sup> ) |         |         |
|------------------------------------------------------------------------|-----------------------------------------------|---------|---------|
|                                                                        | Level 1                                       | Level 2 | Level 3 |
| All PFCAs, PFSA's (except PFOS), EtFOSAA, MeFOSAA, FOSA, FBSA and SRSs | 0.250                                         | 2.50    | 17.5    |
| PFOS                                                                   | 1.00                                          | 10.0    | 70.0    |

  

| <b>Human LCS (prepared in triplicate)</b>                              | Concentration in Plasma (ng mL <sup>-1</sup> ) |         |         |
|------------------------------------------------------------------------|------------------------------------------------|---------|---------|
|                                                                        | Level 1                                        | Level 2 | Level 3 |
| All PFCAs, PFSA's (except PFOS), EtFOSAA, MeFOSAA, FOSA, FBSA and SRSs | 2.50                                           | 17.5    | 175     |
| PFOS                                                                   | 10.0                                           | 70.0    | 700     |

  

| <b>Human B+L LCSs (prepared in triplicate)</b> | Concentration in Plasma (ng mL <sup>-1</sup> ) |         |
|------------------------------------------------|------------------------------------------------|---------|
|                                                | Level 1                                        | Level 2 |
| PFOA, PFHS and SRSs                            | 2.50                                           | 10.0    |
| PFOS                                           | 10.0                                           | 40.0    |

**Method Blank and Sample SRS and IS Spike Levels**

|     | Method Validation (ng/mL <sup>-1</sup> in serum) | American Red Cross (ng/mL <sup>-1</sup> in Serum) |
|-----|--------------------------------------------------|---------------------------------------------------|
| IS  | 17.5                                             | 1.00                                              |
| SRS | 1.00                                             | 1.00                                              |

**Supplementary Table 2** Method analytes, internal standards, and surrogate recovery standards

| <b>Compound</b>                                            | <b>Description</b>                                        | <b>MRM mass transition (s)<sup>a</sup></b> |
|------------------------------------------------------------|-----------------------------------------------------------|--------------------------------------------|
| PFBA (C4 Acid)                                             | Method analyte                                            | 213 > 169                                  |
| PFPeA (C5 Acid)                                            | Method analyte                                            | 263 > 219                                  |
| PFHxA (C6 Acid)                                            | Method analyte                                            | 313 > 269, 313 > 119                       |
| PFHpA (C7 Acid)                                            | Method analyte                                            | 363 > 319, 363 > 169                       |
| PFOA (C8 Acid) (Branched and Linear)                       | Method analyte                                            | 413 > 369, 413 > 219, 413 > 169            |
| PFNA (C9 Acid)                                             | Method analyte                                            | 463 > 419, 463 > 219, 463 > 169            |
| PFDA (C10 Acid)                                            | Method analyte                                            | 513 > 469, 513 > 219                       |
| PFUnA (C11 Acid)                                           | Method analyte                                            | 563 > 519, 563 > 269                       |
| PFDaA (C12 Acid)                                           | Method analyte                                            | 613 > 569, 613 > 219, 613 > 169            |
| PFBS (C4 Sulfonate)                                        | Method analyte                                            | 299 > 99, 299 > 80                         |
| PFHS (C6 Sulfonate) (Branched and Linear)                  | Method analyte                                            | 399 > 99, 399 > 80                         |
| PFOS (C8 Sulfonate) (Branched and Linear)                  | Method analyte                                            | 499 > 130, 499 > 99, 499 > 80              |
| FOSA (C8 Sulfonamide)                                      | Method analyte                                            | 498 > 78                                   |
| MeFOSAA                                                    | Method analyte                                            | 570 > 169, 570 > 219, 570 > 83             |
| EtFOSAA                                                    | Method analyte                                            | 584 > 169, 584 > 219, 584 > 83             |
| FBSA (C4 Sulfonamide)                                      | Method analyte                                            | 298 > 78                                   |
| <b>Internal standards and surrogate recovery standards</b> |                                                           |                                            |
| [1,2,3- <sup>13</sup> C <sub>3</sub> ]PFBA                 | SRS representing C4-C5 PFCAs                              | 216 > 172                                  |
| [1,2,3,4- <sup>13</sup> C <sub>4</sub> ]PFOA               | SRS representing C6-C8 PFCAs                              | 417 > 372                                  |
| [1,2- <sup>13</sup> C <sub>2</sub> ]PFUnA                  | SRS representing C9-C12 PFCAs                             | 565 > 520                                  |
| [1,2,3,4- <sup>13</sup> C <sub>4</sub> ]PFOS               | SRS representing all PFSAs, FBSA, FOSA, EtFOSAA, MeFOSAA  | 503 > 80                                   |
| [1,2,3,4- <sup>13</sup> C <sub>4</sub> ]PFBA               | IS PFBA, (1,2,3- <sup>13</sup> C <sub>3</sub> )PFBA SRS   | 217 > 172                                  |
| [1,2,3,4,5- <sup>13</sup> C <sub>5</sub> ]PFPeA            | IS PFPeA                                                  | 268 > 223                                  |
| [1,2- <sup>13</sup> C <sub>2</sub> ]PFHxA                  | IS PFHxA                                                  | 315 > 270                                  |
| [1,2,3,4]- <sup>13</sup> C <sub>2</sub> ]PFHpA             | IS PFHpA                                                  | 367 > 322                                  |
| [ <sup>13</sup> C <sub>8</sub> ]PFOA                       | IS PFOA, [1,2,3,4- <sup>13</sup> C <sub>4</sub> ]PFOA SRS | 421 > 376                                  |
| [1,2,3,4,5- <sup>13</sup> C <sub>5</sub> ]PFNA             | IS PFNA                                                   | 472 > 427                                  |
| [1,2- <sup>13</sup> C <sub>2</sub> ]PFDA                   | IS PFDA                                                   | 519 > 474                                  |
| [1,2,3,4,5,6,7- <sup>13</sup> C <sub>7</sub> ]PFUnA        | IS PFUnA, [1,2- <sup>13</sup> C <sub>2</sub> ]PFUnA SRS   | 570 > 525                                  |
| [1,2- <sup>13</sup> C <sub>2</sub> ]PFDaA                  | IS PFDaA                                                  | 615 > 570                                  |
| [ <sup>18</sup> O <sub>2</sub> ]PFBS                       | IS PFBS, FBSA                                             | 303 > 84                                   |

**Supplementary Table 2** Method analytes, internal standards, and surrogate recovery standards

| <b>Compound</b>                                       | <b>Description</b>                                        | <b>MRM mass transition (s)<sup>a</sup></b> |
|-------------------------------------------------------|-----------------------------------------------------------|--------------------------------------------|
| [1,2,3- <sup>13</sup> C <sub>3</sub> ]PFHS            | IS PFHS                                                   | 402 > 80                                   |
| [ <sup>13</sup> C <sub>8</sub> ]PFOS                  | IS PFOS, [1,2,3,4- <sup>13</sup> C <sub>4</sub> ]PFOS SRS | 507 > 80                                   |
| [[1,2,3,4,5,6,7,8- <sup>13</sup> C <sub>8</sub> ]FOSA | IS FOSA                                                   | 506 > 78                                   |
| <i>d</i> 3-MeFOSAA                                    | IS MeFOSAA                                                | 573 > 169, 573 > 219, 573 > 83             |
| <i>d</i> 5-EtFOSAA                                    | IS EtFOSAA                                                | 589 > 169, 589 > 219, 589 > 83             |

<sup>a</sup> The individual transitions were summed to produce a SRM plot, which was used for quantitation.

**Supplementary Figure 1: Dilution Factor Calculation**

$$9.63 = \frac{\text{total extract (transferred extract + 5\% H}_3\text{PO}_4), \text{ mL}}{\text{transferred volume of extract, mL}} \times \frac{\text{total extract volume from PPT step, mL}}{\text{volume of serum used, mL}}$$

**Supplementary Table 3.** QC analyte and SRS Recovery Results from American Red Cross Study

| Target Analyte                                                                | Mean Recover<br>y | % RSD (n) | Method Uncertainty |
|-------------------------------------------------------------------------------|-------------------|-----------|--------------------|
| <b>Bovine Serum QCs (Fortified with Linear Reference Substances and SRSs)</b> |                   |           |                    |
| PFHxA (C <sub>6</sub> PFCA)                                                   | 95.4%             | 5.1 (171) | <u>9.6%</u>        |
| PFHpA (C <sub>7</sub> PFCA)                                                   | 94.9%             | 3.9 (171) | <u>7.4%</u>        |
| PFOA (C <sub>8</sub> PFCA)                                                    | 88.3%             | 9.0 (171) | <u>16%</u>         |
| PFNA (C <sub>9</sub> PFCA)                                                    | 96.3%             | 5.3 (171) | <u>10%</u>         |
| PFDA (C <sub>10</sub> PFCA)                                                   | 94.6%             | 10 (171)  | <u>19%</u>         |
| PFUnA (C <sub>11</sub> PFCA)                                                  | 93.5%             | 6.8 (168) | <u>13%</u>         |
| PFDoA (C <sub>12</sub> PFCA)                                                  | 92.9%             | 14 (171)  | <u>26%</u>         |
| PFBS (C <sub>4</sub> PFSA)                                                    | 93.9%             | 3.4 (171) | <u>6.3%</u>        |
| PFHS (C <sub>6</sub> PFSA)                                                    | 95.5%             | 4.0 (171) | <u>7.6%</u>        |
| PFOS (C <sub>8</sub> PFSA)                                                    | 99.0%             | 8.0 (171) | <u>16%</u>         |
| FOSA                                                                          | 95.2%             | 4.1 (171) | <u>7.8%</u>        |
| MeFOSAA                                                                       | 87.4%             | 16 (171)  | <u>28%</u>         |
| EtFOSAA                                                                       | 85.7%             | 17 (171)  | <u>28%</u>         |
| [1,2,3,4- <sup>13</sup> C <sub>4</sub> ]PFOA                                  | 96.3%             | 8.8 (189) | <u>17%</u>         |
| [1,2- <sup>13</sup> C <sub>2</sub> ]PFUnA                                     | 97.3%             | 9.7 (198) | <u>19%</u>         |
| [1,2,3,4- <sup>13</sup> C <sub>4</sub> ]PFOS                                  | 96.1%             | 9.0 (180) | <u>17%</u>         |
| <b>Human Plasma QCs (Fortified with Linear Reference Substances and SRSs)</b> |                   |           |                    |
| PFHxA (C <sub>6</sub> PFCA)                                                   | 93.9%             | 3.1 (171) | <u>5.8%</u>        |
| PFHpA (C <sub>7</sub> PFCA)                                                   | 94.1%             | 3.2 (174) | <u>6.0%</u>        |
| PFOA (C <sub>8</sub> PFCA)                                                    | 92.5%             | 8.1 (126) | <u>15%</u>         |
| PFNA (C <sub>9</sub> PFCA)                                                    | 94.7%             | 5.9 (168) | <u>11%</u>         |
| PFDA (C <sub>10</sub> PFCA)                                                   | 93.1%             | 4.8 (168) | <u>8.9%</u>        |
| PFUnA (C <sub>11</sub> PFCA)                                                  | 93.8%             | 4.9 (177) | <u>9.0%</u>        |
| PFDoA (C <sub>12</sub> PFCA)                                                  | 93.4%             | 3.6 (153) | <u>6.6%</u>        |
| PFBS (C <sub>4</sub> PFSA)                                                    | 93.5%             | 3.4 (174) | <u>6.3%</u>        |
| PFHS (C <sub>6</sub> PFSA)                                                    | 95.2%             | 5.8 (165) | <u>11%</u>         |
| PFOS (C <sub>8</sub> PFSA)                                                    | 95.6%             | 9.2 (174) | <u>17%</u>         |
| FOSA                                                                          | 94.7%             | 4.1 (175) | <u>7.7%</u>        |
| MeFOSAA                                                                       | 83.8%             | 12 (153)  | <u>21%</u>         |
| EtFOSAA                                                                       | 83.9%             | 14 (153)  | <u>23%</u>         |
| <b>Human Plasma QCs (Fortified with Technical Reference Substances)</b>       |                   |           |                    |
| PFOA (Technical)                                                              | 83.7%             | 7.2 (114) | <u>12%</u>         |
| PFHS (Technical)                                                              | 101%              | 5.0 (114) | <u>10%</u>         |
| PFOS (Technical)                                                              | 102%              | 5.8 (108) | <u>12%</u>         |

**Human Plasma QCs (SRSs) [d]**

|                                              |       |           |            |
|----------------------------------------------|-------|-----------|------------|
| [1,2,3,4- <sup>13</sup> C <sub>4</sub> ]PFOA | 87.8% | 7.5 (324) | <u>13%</u> |
| [1,2- <sup>13</sup> C <sub>2</sub> ]PFUnA    | 89.2% | 8.2 (339) | <u>14%</u> |
| [1,2,3,4- <sup>13</sup> C <sub>4</sub> ]PFOS | 87.5% | 7.7 (309) | <u>13%</u> |

**American Red Cross Adult Blood Donor Samples (SRS Recoveries)**

|                                              |       |           |           |
|----------------------------------------------|-------|-----------|-----------|
| [1,2,3,4- <sup>13</sup> C <sub>4</sub> ]PFOA | 89.0% | 7.3 (736) | ± 13% [a] |
| [1,2- <sup>13</sup> C <sub>2</sub> ]PFUnA    | 91.8% | 10 (736)  | ± 19% [b] |
| [1,2,3,4- <sup>13</sup> C <sub>4</sub> ]PFOS | 89.4% | 7.9 (736) | ± 14% [c] |

[a] Value is estimated data uncertainty for shorter chain length PFCAs: PFHxA, PFHpA, PFOA and PFNA in samples

[b] Value is estimated data uncertainty for long chain PFCAs: PFDA, PFUnA and PFDoA in samples

[c] Value is estimated data uncertainty for sulfonates/sulfonamides: PFBS, PFHS, PFOS, FOSA, MeFOSAA and EtFOSAA

[d] Values derived from both human plasma QC fortified with all analytes and human plasma QC fortified with only Technical Reference Substances.

Uncertainty values calculated according to A2LA guidance document "G104-Guide for Estimation of Measurement Uncertainty in Testing-December 4, 2014". Uncertainty is expressed as X (1±kσ); where X is the measured result k is the k-factor at the 95% confidence level and σ is the standard deviation.

**Supplementary Table 4: NIST SRM 1957 Results**

| Analyte | Average Concentration (ng mL <sup>-1</sup> ) | % RSD | n <sup>[a]</sup> | NIST SRM 1957 Ref. Value(ng mL <sup>-1</sup> ) | Average Accuracy (%) |
|---------|----------------------------------------------|-------|------------------|------------------------------------------------|----------------------|
| PFOA    | 4.16                                         | 13%   | 18               | 5.00                                           | 83.2%                |
| PFOS    | 21.5                                         | 8.7%  | 18               | 21.1                                           | 102%                 |
| PFHS    | 3.58                                         | 12%   | 18               | 4.00                                           | 89.5%                |

[a] Values are from 6 separate extractions, each time prepared in triplicate.

Supplementary Table 5. LLOQs

| Analyte                                      | Method Validation LLOQ Achieved (ng mL <sup>-1</sup> ) | LLOQs Achieved for American Red Cross for 21 batches (ng mL <sup>-1</sup> in Serum/Plasma) | Number of American Red Cross Samples that were below the LLOQ (out of 736) |
|----------------------------------------------|--------------------------------------------------------|--------------------------------------------------------------------------------------------|----------------------------------------------------------------------------|
| PFBA                                         | 4.82                                                   | ND                                                                                         | ND                                                                         |
| PFPeA                                        | 0.0963                                                 | ND                                                                                         | ND                                                                         |
| PFBS                                         | 0.0482                                                 | 0.0232, 0.0465                                                                             | 679                                                                        |
| PFHxA                                        | 0.0481                                                 | 0.0232, 0.0932                                                                             | 681                                                                        |
| PFHpA                                        | 0.0482                                                 | 0.0466, 0.0932                                                                             | 643                                                                        |
| PFHS                                         | 0.0482                                                 | 0.0233, 0.0466                                                                             | 2                                                                          |
| PFOA                                         | 0.0963                                                 | 0.0232, 0.0465, 0.0932                                                                     | 2                                                                          |
| PFNA                                         | 0.0482                                                 | 0.0233, 0.0466, 0.0932                                                                     | 2                                                                          |
| PFOS                                         | 0.193                                                  | 0.0932, 0.186, 0.372                                                                       | 0                                                                          |
| PFDA                                         | 0.0482                                                 | 0.0233, 0.0466, 0.0932                                                                     | 21                                                                         |
| FBSA                                         | 0.0481                                                 | ND                                                                                         | ND                                                                         |
| PFUnA                                        | 0.0963                                                 | 0.0466, 0.0932, 0.233                                                                      | 381                                                                        |
| PFDoA                                        | 0.240                                                  | 0.0466, 0.0932, 0.233                                                                      | 732                                                                        |
| MeFOSAA                                      | 0.240                                                  | 0.0232, 0.0465, 0.232                                                                      | 190                                                                        |
| EtFOSAA                                      | 0.0481                                                 | 0.0232, 0.0465, 0.0932, 0.232                                                              | 656                                                                        |
| FOSA                                         | 0.0240                                                 | 0.0232, 0.0932                                                                             | 731                                                                        |
| [1,2,3- <sup>13</sup> C <sub>3</sub> ]PFBA   | 0.0959                                                 | ND                                                                                         | ND                                                                         |
| [1,2,3,4- <sup>13</sup> C <sub>4</sub> ]PFOA | 0.0963                                                 | 0.0232, 0.0465, 0.0932                                                                     | NA                                                                         |
| [1,2- <sup>13</sup> C <sub>2</sub> ]PFUnA    | 0.0963                                                 | 0.0232, 0.0465, 0.0932                                                                     | NA                                                                         |
| [1,2,3,4- <sup>13</sup> C <sub>4</sub> ]PFOS | 0.0920                                                 | 0.0222, 0.0446, 0.0890                                                                     | NA                                                                         |

ND; Analytes were not analyzed in Study

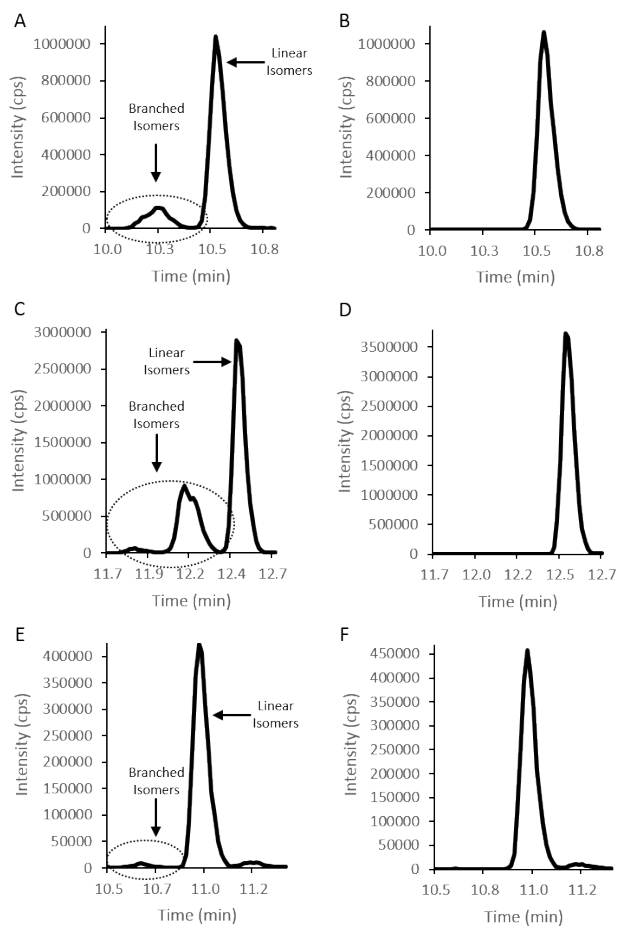

**Supplementary Figure 2:** Branched vs. Linear Isomers. A. TECHNICAL-PFHS (18.9% Branched) B. L-PFHS C. TECHNICAL-PFOS (30.1% Branched) D. L-PFOS E. TECHNICAL PFOA (4.7% Branched) F. L-PFOA.
